# Supplementary material for: Cryo-Technologies for Ex Situ Conservation of Rosa Germplasm
Source: MDPI journal article supplement (doi:10.3390/plants11081095), 2022-04-18
Supplement: s1 [file s1]

**Table S1.** Morphological and horticultural characteristics of rose genotypes used in cryopreservation studies.

| Character description                       | <i>Rosa x hybrida</i> (L.) genotypes                                                |                                                                                      |                                                                                       |
|---------------------------------------------|-------------------------------------------------------------------------------------|--------------------------------------------------------------------------------------|---------------------------------------------------------------------------------------|
|                                             | 'Ioana'                                                                             | 'Mariana'                                                                            | 'Vulcan'                                                                              |
|                                             |    |    |    |
| Plant habitus                               | upright                                                                             | upright                                                                              | upright                                                                               |
| Plant height (cm)                           | 91 ± 1.52a*                                                                         | 90 ± 1.55a                                                                           | 79.6 ± 1.62b                                                                          |
| Young shoot (20 cm in length)               | strong                                                                              | strong                                                                               | medium                                                                                |
| Leaf length/color                           | medium/medium                                                                       | high/intense                                                                         | high/intense                                                                          |
| Leaflet: undulation of margin               | weak                                                                                | strong                                                                               | strong                                                                                |
| Leaflet transversal section                 | slightly concave                                                                    | slightly concave                                                                     | straight                                                                              |
|                                             | weak                                                                                | strong                                                                               | strong                                                                                |
| Glossiness of the upper surface of the leaf |  |  |  |
|                                             | curved/curved                                                                       | curved/curved                                                                        | curved/curved                                                                         |
| Thorn shape at top/base                     |  |  |  |
| Number of short thorns (length<5 mm)        | small                                                                               | small                                                                                | very high                                                                             |
| Number of long thorns (length>5 mm)         | medium                                                                              | medium                                                                               | medium                                                                                |
| Flowering shoots (number of flowers)        | medium (5)                                                                          | medium (5)                                                                           | very high (9)                                                                         |

|                                                   |                                                                                     |                                                                                      |                                                                                       |
|---------------------------------------------------|-------------------------------------------------------------------------------------|--------------------------------------------------------------------------------------|---------------------------------------------------------------------------------------|
|                                                   |    |    |    |
| Flowering                                         | early blooming;<br>flowering period 104<br>days                                     | early blooming;<br>flowering period 96<br>days                                       | late blooming;<br>flowering period 87<br>days                                         |
|                                                   | small                                                                               | small                                                                                | medium                                                                                |
| Flower peduncle<br>(number of hairs or<br>thorns) |    |    |    |
|                                                   | ovoid                                                                               | ovoid                                                                                | globose                                                                               |
| Floral bud                                        |  |  |  |
|                                                   | semi-double                                                                         | double                                                                               | double                                                                                |
| Inflorescence type                                |  |  |  |
| Corolla shape                                     | irregularly rounded                                                                 | irregularly rounded                                                                  | irregularly rounded                                                                   |
| Flower color                                      | white                                                                               | pink                                                                                 | red                                                                                   |
| Diameter of flowers<br>(cm)                       | $10.3 \pm 1.74a$                                                                    | $11.6 \pm 1.52a$                                                                     | $7.8 \pm 1.83b$                                                                       |
| Number of petals/flower                           | $20 \pm 1.55b$                                                                      | $35 \pm 1.73a$                                                                       | $34.4 \pm 2.15a$                                                                      |

|                                        |                     |                     |                     |
|----------------------------------------|---------------------|---------------------|---------------------|
| Petals size/shape                      | medium/obovate      | high/obovate        | medium/round        |
| Sepals                                 | short               | medium              | medium              |
| Stamen (predominant color of filament) | pink                | pink                | yellow              |
| Style (size/color)                     | medium/green-yellow | medium/green-yellow | medium/green-yellow |

\*Values represent means  $\pm$  standard deviation (SD); Values followed by the same letter within a row are not significantly different ( $P \leq 0.05$ ).
